# Supplementary material for: Foveal Eversion is Associated with High Persistence of Macular Edema and Visual Acuity Deterioration in Retinal Vein Occlusion
Source: Springer Nature journal article supplement (doi:10.1007/s40123-023-00734-9), 2023-06-09
Supplement: MOESM1 [file 25468138]

## **Supplementary Material**

### **Foveal eversion is associated with high persistence of macular edema and visual acuity deterioration in retinal vein occlusion**

Alessandro Arrigo MD,PhD, Emanuela Aragona MD,PhD, Alessio Antropoli MD, Lorenzo Bianco MD, Andrea Rosolia MD, Andrea Saladino MD, Francesco Bandello MD,FEBO, Maurizio Battaglia Parodi MD.

Department of Ophthalmology, IRCCS San Raffaele Scientific Institute, Milan, Italy

#### **Corresponding Author**

Alessandro Arrigo MD,PhD, Department of Ophthalmology, IRCCS San Raffaele Scientific Institute, via Olgettina 60, Milan, 20132, Italy

Tel: +390226432648

Fax: +390226432648

Email: [alessandro.arrigo@hotmail.com](mailto:alessandro.arrigo@hotmail.com)

**Table 1:** Clinical data of CRVO eyes with and without foveal eversion.

| <b>Table 1</b>                       |                 |                   |                |
|--------------------------------------|-----------------|-------------------|----------------|
| <b>Parameter</b>                     | <b>CRVO FE</b>  | <b>CRVO No FE</b> | <b>p Value</b> |
| <b>Number of eyes</b>                | 64              | 104               |                |
| <b>Months of follow-up</b>           | 48 ± 25         | 34 ± 23           |                |
| <b>Gender (M/F)</b>                  | 40/24 (63%/37%) | 72/32 (69%/31%)   | >0.05          |
| <b>Age (Years)</b>                   | 70 ± 12         | 65 ± 16           | >0.05          |
| <b>Cataract surgery</b>              | 23 (36%)        | 30 (29%)          | >0.05          |
| <b>LogMAR BCVA baseline</b>          | 0.6 ± 0.4       | 0.6 ± 0.4         | >0.05          |
| <b>LogMAR BCVA after 12 months</b>   | 0.5 ± 0.4       | 0.4 ± 0.5         | >0.05          |
| <b>LogMAR BVCA last</b>              | 0.7 ± 0.4       | 0.5 ± 0.5         | <0.01          |
| <b>p Value BCVA baseline vs last</b> | >0.05           | >0.05             |                |
| <b>CMT baseline</b>                  | 636 ± 217       | 514 ± 220         | <0.01          |
| <b>CMT after 12 months</b>           | 465 ± 222       | 356 ± 249         | <0.01          |
| <b>CMT last</b>                      | 443 ± 248       | 277 ± 90          | <0.01          |
| <b>p Value CMT baseline vs last</b>  | <0.01           | <0.01             |                |
| <b>Laser (Y/N)</b>                   | 20 (31%)        | 31 (30%)          | >0.05          |
| <b>iRVO (Y/N)</b>                    | 20 (31%)        | 37 (35%)          | >0.05          |
| <b>N. of Intravitreal Injections</b> | 12 ± 8          | 6 ± 7             |                |

**Table 2:** Clinical and imaging data among different foveal eversion patterns in CRVO. For simplicity, considering the lower number of eyes, the statistical comparison has been done considering FE pattern 1a + 1b vs FE pattern 2.

| <b>Table 2</b>                       |                           |                           |                          |                             |
|--------------------------------------|---------------------------|---------------------------|--------------------------|-----------------------------|
| <b>Parameter</b>                     | <b>CRVO FE Pattern 1a</b> | <b>CRVO FE Pattern 1b</b> | <b>CRVO FE Pattern 2</b> | <b>p Value (1a+1b vs 2)</b> |
| <b>Number of eyes</b>                | 6                         | 17                        | 41                       |                             |
| <b>Gender (M/F)</b>                  | 3/3 (50%/50%)             | 12/5 (70%/30%)            | 25/16 (61%/39%)          | >0.05                       |
| <b>Age (Years)</b>                   | 64 ± 11                   | 70 ± 10                   | 70 ± 13                  | >0.05                       |
| <b>Cataract surgery</b>              | 3 (50%)                   | 5 (30%)                   | 15 (36%)                 | >0.05                       |
| <b>LogMAR BCVA baseline</b>          | 0.5 ± 0.3                 | 0.5 ± 0.3                 | 0.6 ± 0.4                | >0.05                       |
| <b>LogMAR BCVA after 12 months</b>   | 0.4 ± 0.3                 | 0.4 ± 0.4                 | 0.6 ± 0.4                | >0.05                       |
| <b>LogMAR BVCA last</b>              | 0.6 ± 0.5                 | 0.6 ± 0.4                 | 0.8 ± 0.3                | <0.01                       |
| <b>p Value BCVA baseline vs last</b> | >0.05                     | >0.05                     | <0.05                    |                             |
| <b>CMT baseline</b>                  | 650 ± 200                 | 650 ± 215                 | 630 ± 224                | >0.05                       |
| <b>CMT after 12 months</b>           | 493 ± 254                 | 400 ± 154                 | 487 ± 240                | >0.05                       |
| <b>CMT last</b>                      | 304 ± 163                 | 457 ± 267                 | 458 ± 248                | >0.05                       |
| <b>p Value CMT baseline vs last</b>  | <0.05                     | <0.05                     | <0.05                    |                             |
| <b>Laser (Y/N)</b>                   | 2/4 (33%/66%)             | 6/11 (35%/65%)            | 12/29 (29%/71%)          | >0.05                       |
| <b>iRVO (Y/N)</b>                    | 1/5 (20%/80%)             | 2/15 (13%/87%)            | 17/24 (41%/59%)          | <0.01                       |
| <b>N. of Injections</b>              | 13 ± 8                    | 11 ± 8                    | 12 ± 9                   |                             |

**Table 3:** Clinical data of BRVO eyes with and without foveal eversion.

| <b>Table 3<br/>Parameter</b>         | <b>BRVO FE</b> | <b>BRVO No FE</b> | <b>p Value</b> |
|--------------------------------------|----------------|-------------------|----------------|
| <b>Number of eyes</b>                | 25             | 91                |                |
| <b>Months of follow-up</b>           | 44 ± 25        | 34 ± 23           |                |
| <b>Gender (M/F)</b>                  | 9/16 (36%/64%) | 47/44 (52%/48%)   | >0.05          |
| <b>Age (Years)</b>                   | 72±11          | 71±11             | >0.05          |
| <b>Cataract surgery</b>              | 9 (36%)        | 30 (33%)          | >0.05          |
| <b>LogMAR BCVA baseline</b>          | 0.6 ± 0.3      | 0.4 ± 0.3         | <0.01          |
| <b>LogMAR BCVA after 12 months</b>   | 0.5 ± 0.3      | 0.3 ± 0.3         | <0.01          |
| <b>LogMAR BVCA last</b>              | 0.5 ± 0.4      | 0.3 ± 0.4         | <0.01          |
| <b>p Value BCVA baseline vs last</b> | >0.05          | >0.05             |                |
| <b>CMT baseline</b>                  | 567 ± 190      | 485 ± 160         | <0.01          |
| <b>CMT after 12 months</b>           | 438 ± 151      | 350 ± 94          | <0.01          |
| <b>CMT last</b>                      | 417 ± 152      | 278 ± 77          | <0.01          |
| <b>p Value CMT baseline vs last</b>  | <0.01          | <0.01             |                |
| <b>Laser (Y/N)</b>                   | 9/16 (36%/64%) | 41/50 (45%/55%)   | >0.05          |
| <b>iRVO (Y/N)</b>                    | 9/16 (36%/64%) | 41/50 (45%/55%)   | >0.05          |
| <b>N. of Injections</b>              | 10 ± 9         | 5 ± 5             |                |

**Table 4:** Clinical and imaging data among different foveal eversion patterns in BRVO. For simplicity, considering the lower number of eyes, the statistical comparison has been done considering FE pattern 1a + 1b vs FE pattern 2.

| <b>Table 4<br/>Parameter</b>         | <b>BRVO FE pattern 1a + 1b</b> | <b>BRVO FE pattern 2</b> | <b>p Value<br/>(1a+1b vs 2)</b> |
|--------------------------------------|--------------------------------|--------------------------|---------------------------------|
| <b>Number of eyes</b>                | 8                              | 17                       |                                 |
| <b>Gender (M/F)</b>                  | 4/4 (50%/50%)                  | 5/12 (29%/71%)           | >0.05                           |
| <b>Age (Years)</b>                   | 67 ± 14                        | 74 ± 10                  | >0.05                           |
| <b>Cataract surgery</b>              | 3 (37%)                        | 6 (35 %)                 | >0.05                           |
| <b>LogMAR BCVA baseline</b>          | 0.5 ± 0.2                      | 0.6 ± 0.3                | >0.05                           |
| <b>LogMAR BCVA after 12 months</b>   | 0.3 ± 0.2                      | 0.5 ± 0.3                | <0.05                           |
| <b>LogMAR BVCA last</b>              | 0.3 ± 0.3                      | 0.6 ± 0.4                | <0.05                           |
| <b>p Value BCVA baseline vs last</b> | >0.05                          | >0.05                    |                                 |
| <b>CMT baseline</b>                  | 537 ± 112                      | 581 ± 219                | >0.05                           |
| <b>CMT after 12 months</b>           | 422 ± 115                      | 446 ± 168                | >0.05                           |
| <b>CMT last</b>                      | 415 ± 177                      | 418 ± 161                | >0.05                           |
| <b>p Value CMT baseline vs last</b>  | <0.05                          | <0.05                    |                                 |
| <b>Laser (Y/N)</b>                   | 2/6 (25%/75%)                  | 7/10 (41%/59%)           | <0.05                           |
| <b>iRVO (Y/N)</b>                    | 2/6 (25%/75%)                  | 7/10 (41%/59%)           | <0.05                           |
| <b>N. of Injections</b>              | 8 ± 7                          | 11 ± 9                   |                                 |

**Table 5:** Resumed distribution of resolved, recurrent and persistent macular edema in CRVO and BRVO eyes with and without foveal eversion. For simplicity, for BRVO eyes, considering the lower number of eyes, the statistical comparison has been done considering FE pattern 1a + 1b vs FE pattern 2.

| Table 5                        | Macular Edema |           |            |
|--------------------------------|---------------|-----------|------------|
|                                | Resolved      | Recurrent | Persistent |
| <b>CRVO FE Pattern 1a</b>      | 3 (50%)       | 2 (34%)   | 1 (16%)    |
| <b>CRVO FE Pattern 1b</b>      | 8 (48%)       | 5 (29%)   | 4 (23%)    |
| <b>CRVO FE Pattern 2</b>       | 8 (19%)       | 9 (22%)   | 24 (59%)   |
| <b>CRVO No FE</b>              | 65 (63%)      | 30 (29%)  | 9 (8%)     |
| <hr/>                          |               |           |            |
| <b>BRVO FE Pattern 1a + 1b</b> | 4 (50%)       | 2 (25%)   | 2 (25%)    |
| <b>BRVO FE Pattern 2</b>       | 4 (23.5%)     | 4 (23.5%) | 9 (53%)    |
| <b>BRVO No FE</b>              | 56 (61%)      | 28 (31%)  | 7 (8%)     |
